# Supplementary material
Source: PubMed Central journal article supplement (PMC9472746)
Supplement: 41578_2022_477_MOESM1_ESM.pdf [file 41578_2022_477_MOESM1_ESM.pdf]

**Supplementary information**

---

**Mucosa-interfacing electronics**

---

In the format provided by the  
authors and unedited

## **SUPPLEMENTARY INFORMATION**

### **Mucosa-Interfacing Electronics**

Kewang Nan<sup>1,2,4</sup>, Vivian R Feig<sup>2,3,4</sup>, Binbin Ying<sup>1,2,4</sup>, Julia G Howarth<sup>1</sup>, Ziliang Kang<sup>1,2</sup>, Yiyuan Yang<sup>1</sup>  
and Giovanni Traverso<sup>1,2†</sup>

<sup>1</sup> Department of Mechanical Engineering, Massachusetts Institute of Technology, Cambridge, MA, USA

<sup>2</sup> Division of Gastroenterology, Hepatology and Endoscopy, Brigham and Women's Hospital, Harvard Medical School, Boston, MA, USA

<sup>3</sup> Koch Institute for Integrative Cancer Research, Massachusetts Institute of Technology, Cambridge, MA, USA

<sup>4</sup>These authors contributed equally.

† email: cgt20@mit.edu

**Table S1: Detailed comparisons between skin and mucosa regarding structures, dynamics, and chemical/biological environments.**

| Properties                   | Skin                                                                           | Mucosa                                                                                                                                                                                                                                                                                                                                                                                                                                                                                                                                                                                                                                          |
|------------------------------|--------------------------------------------------------------------------------|-------------------------------------------------------------------------------------------------------------------------------------------------------------------------------------------------------------------------------------------------------------------------------------------------------------------------------------------------------------------------------------------------------------------------------------------------------------------------------------------------------------------------------------------------------------------------------------------------------------------------------------------------|
| Surface area                 | 2 m <sup>2</sup> <sup>1</sup>                                                  | <b>Digestive Tract:</b> 32 m <sup>2</sup> <sup>2</sup><br><b>Respiratory Tract:</b> <i>lungs:</i> 35m <sup>2</sup> (deep expiration); 100 m <sup>2</sup> <sup>3</sup> (deep inspiration)<br><b>Female Reproductive Tract:</b> <i>uterus:</i> 0.048 – 0.065 m <sup>2</sup><br><b>Urinary Tract:</b> <i>bladder:</i> 0.02-0.03 m <sup>2</sup> <sup>4</sup>                                                                                                                                                                                                                                                                                        |
| Thickness                    | 0.5-4 mm <sup>5</sup>                                                          | <b>Digestive Tract:</b> <i>esophagus:</i> 1.9-5.7 mm; <i>stomach:</i> 3-6 mm; <i>small intestines:</i> 0.9-1.6 mm; <i>colon:</i> 1.1-2.1 mm <sup>6,7</sup><br><b>Respiratory Tract:</b> <i>lungs:</i> 1.5-9 mm <sup>8</sup> ; <i>bronchi:</i> 1.2-1.4 mm <sup>9</sup><br><b>Female Reproductive Tract:</b> <i>uterus:</i> 2-16 mm <sup>10</sup><br><b>Urinary Tract:</b> <i>bladder:</i> 2-4 mm <sup>11</sup>                                                                                                                                                                                                                                   |
| Elastic modulus              | <i>Stratum Corneum:</i> 75 – 300 MPa (dry), 10 – 50 MPa (wet) <sup>12,13</sup> | <b>Digestive tract:</b> <i>esophagus:</i> ~1.2 MPa; <i>stomach:</i> 0.5-0.7 MPa; <i>small intestines:</i> ~0.9 MPa; <i>colon:</i> ~0.9 MPa <sup>14</sup><br><b>Respiratory Tract:</b> <i>respiratory duct:</i> 0.06-0.4 MPa <sup>15,16</sup> ; <i>bronchi:</i> 0.0007-0.025 MPa <sup>17</sup><br><b>Female Reproductive Tract:</b> <i>vaginal mucosa (premenopausal):</i> 11.5MPa; <i>vaginal mucosa (postmenopausal):</i> 14.35MPa; <i>uterus:</i> 0.5-2MPa <sup>18,19</sup><br><b>Urinary Tract:</b> <i>bladder mucosa:</i> 0.087-0.18 MPa; <i>bladder detrusor muscle:</i> 0.007-0.012 MPa; <i>adventitia:</i> 0.009-0.022 MPa <sup>20</sup> |
| Elongation (Strain) at break | 40-180% <sup>21</sup>                                                          | <b>Digestive Tract:</b> <i>esophagus:</i> 140%; <i>stomach:</i> 190%; <i>small intestine:</i> 140%; <i>colon:</i> 180% <sup>14,22</sup><br><b>Respiratory Tract:</b> <i>lungs:</i> 150-200% <sup>23</sup><br><b>Female Reproductive Tract:</b> <i>normal cervix:</i> 5-10%; <i>short cervix:</i> 4-6% <sup>19</sup><br><b>Urinary Tract:</b> <i>bladder:</i> ~300% <sup>24</sup>                                                                                                                                                                                                                                                                |
| Cellular turnover rate       | ~27 days <sup>25</sup>                                                         | <b>Digestive Tract:</b> <i>esophagus:</i> 5-8 days <sup>26,27</sup> ; <i>stomach:</i> 4-20 days <sup>28</sup> ; <i>small intestines:</i> 4-5 days; <i>colon:</i> 4 days <sup>29,30</sup><br><b>Respiratory Tract:</b> <i>lungs:</i> 0.3% cells at any time <sup>31</sup> ; <i>bronchi:</i> ~150 days <sup>28</sup><br><b>Female Reproductive Tract:</b> <i>cervix:</i> 5.7 days <sup>32</sup><br><b>Urinary Tract:</b> <i>urothelium cells:</i> 3-6 months <sup>33</sup> ; <i>bladder:</i> ~200 days <sup>34</sup>                                                                                                                              |
| Mode of motion               | Stretching, folding, and compression due to body motion                        | <b>Digestive Tract:</b> peristalsis ( <i>stomach:</i> 0.05 Hz, <i>small intestines:</i> 0.15-0.2 Hz, <i>colon:</i> 0.01-0.04 Hz (long-duration), 0.05-0.2 Hz (short-duration) <sup>35</sup> )<br><b>Respiratory Tract:</b> respiration (0.2–0.34 Hz) <sup>36</sup>                                                                                                                                                                                                                                                                                                                                                                              |

|                              |                                                                                                                |                                                                                                                                                                                                                                                                                                                                                                                                                                                                                                                                                                                                                                                                                               |
|------------------------------|----------------------------------------------------------------------------------------------------------------|-----------------------------------------------------------------------------------------------------------------------------------------------------------------------------------------------------------------------------------------------------------------------------------------------------------------------------------------------------------------------------------------------------------------------------------------------------------------------------------------------------------------------------------------------------------------------------------------------------------------------------------------------------------------------------------------------|
|                              |                                                                                                                | <p><b>Female Reproductive Tract:</b> uterine contraction (0.02-0.08 Hz)<sup>37</sup></p> <p><b>Urinary Tract:</b> bladder emptying (4-5 times per day)</p>                                                                                                                                                                                                                                                                                                                                                                                                                                                                                                                                    |
| <b>Mean temperature</b>      | <p>At rest: 28.1 - 34.7 °C</p> <p>In cold conditions: 19.4 - 30.3 °C</p> <p>During exercise: 38.2- 40.1 °C</p> | <p><b>Digestive Tract:</b> between 36.5-37.5 °C with small variations<sup>38,39</sup></p> <p><b>Respiratory Tract:</b> <i>upper trachea:</i> 29.2-32°C; <i>subsegmental bronchi:</i> 33.9-35.5 °C. In cold conditions: <i>upper trachea:</i> ~20.5 °C; <i>subsegmental bronchi:</i> 31.6 °C<sup>40</sup></p> <p><b>Female Reproductive Tract:</b> temperature slightly increased (by 0.3-0.5 °C) after ovulation<sup>41</sup></p> <p><b>Urinary Tract: Bladder:</b> 36.0-38.3°C<sup>42,43</sup></p>                                                                                                                                                                                           |
| <b>Secretion pH</b>          | 4-6 <sup>44</sup>                                                                                              | <p><b>Digestive Tract:</b> <i>esophagus:</i> 5-7; <i>stomach:</i> 1.0-2.5; <i>small intestines:</i> 6.1-7.1; <i>colon:</i> 7.1-7.5<sup>45</sup></p> <p><b>Respiratory Tract:</b> 7.38-7.42<sup>46,47</sup></p> <p><b>Female Reproductive Tract:</b> <i>endocervix:</i> 6.5-7.5; <i>vagina:</i> 3.4-7.4<sup>48</sup></p> <p><b>Urinary Tract:</b> 4.6-8.0<sup>49</sup></p>                                                                                                                                                                                                                                                                                                                     |
| <b>Secretion Rate</b>        | Sweat rate is in general low, but can be up to 2-4 L/hour during exercise <sup>50</sup>                        | <p><b>Digestive Tract:</b> <i>stomach:</i> 1.2-1.5 L/day<sup>51</sup>; <i>small intestines:</i> 0.5L /day from liver, 1.5 L/day from pancreas<sup>52</sup>; <i>colon:</i> 1.5-2 L/day<sup>51</sup></p> <p><b>Respiratory Tract:</b> 2L/day<sup>53</sup></p> <p><b>Female Reproductive Tract:</b> 2-5 mL/day<sup>54</sup></p> <p><b>Urinary Tract:</b> 0.8-2 L/day<sup>55</sup></p>                                                                                                                                                                                                                                                                                                            |
| <b>Secretion Composition</b> | Ammonia, urea, mineral salts, sugar <sup>56</sup>                                                              | <p><b>Digestive Tract:</b> <i>stomach:</i> hydrochloric acid, electrolytes, mucin, pepsin, and protein<sup>57,58</sup>; <i>small intestines:</i> mucin, digestive enzymes, hormones, electrolytes<sup>51</sup>; <i>colon:</i> electrolytes, mucin, niacin, vitamins<sup>51</sup></p> <p><b>Respiratory Tract:</b> water, carbohydrates, lipids, mucin, proteins<sup>53,59</sup></p> <p><b>Female Reproductive Tract:</b> vaginal discharge<sup>54</sup></p> <p><b>Urinary Tract:</b> urine<sup>60</sup></p>                                                                                                                                                                                   |
| <b>Microbes</b>              | Density: 10 <sup>4</sup> to 10 <sup>6</sup> /cm <sup>2</sup> <sup>61</sup> (bacteria, fungi, viruses)          | <p><b>Digestive Tract:</b> density of bacteria: 10/gram (stomach), 10<sup>3</sup>/gram (duodenum), 10<sup>4</sup>/gram (jejunum), 10<sup>7</sup>/gram (ileum), 10<sup>12</sup>/gram (colon)<sup>62</sup>; play crucial roles in maintaining homeostasis and protecting against pathogens, and have shown ties with inflammatory diseases<sup>63</sup> and neurological disorders<sup>64</sup></p> <p><b>Respiratory Tract:</b> low density (10<sup>2</sup>-10<sup>3</sup>/ml) and function as gatekeepers to respiratory health<sup>65</sup></p> <p><b>Female Reproductive Tract:</b> exist in abundance (10<sup>8</sup>/ml) and influence maternal and fetal immune systems<sup>66</sup></p> |

|            |                 |                                                                                                                                                                                                                                                                                                                                    |
|------------|-----------------|------------------------------------------------------------------------------------------------------------------------------------------------------------------------------------------------------------------------------------------------------------------------------------------------------------------------------------|
|            |                 | <b>Urinary Tract:</b> typical density: $10^3$ - $10^5$ /ml; show correlations with many urinary conditions (e.g. kidney stone diseases, acute&chronic kidney injury, urinary tract infections) <sup>67</sup>                                                                                                                       |
| <b>Gas</b> | Atmospheric air | <b>Digestive Tract:</b> (in addition to atmospheric air) carbon dioxide, hydrogen, methane, and hydrogen sulfide <sup>68</sup><br><b>Urinary Tract:</b> high concentration of carbon dioxide in patients with diabetes <sup>69</sup><br><b>Female Reproductive Tract:</b> increased carbon monoxide during pregnancy <sup>70</sup> |

**Table S2: Detailed comparisons between skin and mucosa regarding epithelial types and sensing functions.**

| Anatomic Sites          | Schematic of Surface Epithelium and Receptor Types                                                                      | Main Functions of Epithelium                                                                                | Main Sensory Receptor Types and Inputs                                                                                                                                                                                                                                                                                                                                                      | Functional Outcomes                                                                                                                                                                                                                                                          |
|-------------------------|-------------------------------------------------------------------------------------------------------------------------|-------------------------------------------------------------------------------------------------------------|---------------------------------------------------------------------------------------------------------------------------------------------------------------------------------------------------------------------------------------------------------------------------------------------------------------------------------------------------------------------------------------------|------------------------------------------------------------------------------------------------------------------------------------------------------------------------------------------------------------------------------------------------------------------------------|
| Skin                    | 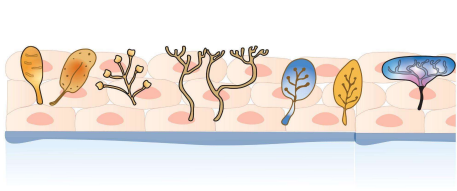 <p>Stratified squamous epithelium</p> | Protection against mechanical abrasions, microorganisms, and water loss                                     | <ul style="list-style-type: none"> <li>•<b>Mechanoreceptors:</b> pressure, skin stretch and deformation, vibration <sup>71</sup></li> <li>•<b>Nociceptors:</b> mechanical injury, extreme temperatures, reactive chemical species <sup>72</sup></li> <li>•<b>Thermoreceptors:</b> external temperature <sup>73</sup></li> <li>•<b>Photoreceptors:</b> UV radiation <sup>74</sup></li> </ul> | <ul style="list-style-type: none"> <li>•Sensations of touch, pain, temperature, position, texture</li> <li>•Regulation of blood flow, sweating, melanin production <sup>74</sup>, immune responses <sup>72</sup></li> </ul>                                                  |
| Gastrointestinal mucosa |  <p>Simple columnar epithelium</p>   | Secretion and absorption; transport substance in a specific direction; protection against acid and bacteria | <ul style="list-style-type: none"> <li>•<b>Mechanoreceptors:</b> stretching</li> <li>•<b>Nociceptors:</b> toxins, bacteria, inflammation <sup>75</sup></li> <li>•<b>Chemoreceptors:</b> nutrients, endocrine mediators, immune mediators <sup>76</sup>, acids <sup>77</sup>, gasses <sup>77</sup></li> <li>•<b>Thermoreceptors:</b> heating and cooling <sup>78</sup></li> </ul>            | <ul style="list-style-type: none"> <li>•Regulation of digestion, peristalsis, blood flow, fluid transport, and gut homeostasis <sup>76</sup></li> <li>•Sensations of taste (sweet, salty, sour, umami, bitter), satiety, nausea, pressure, and pain <sup>76</sup></li> </ul> |

|                                                                                                                                                                                                                                                                                                                                                                                                                                                                                                                                                                                                                                                                                                            |                                                                                                                               |                                                                                    |                                                                                                                                                                                                                                                                                                                      |                                                                                                                                                                                                                                                                                                                 |
|------------------------------------------------------------------------------------------------------------------------------------------------------------------------------------------------------------------------------------------------------------------------------------------------------------------------------------------------------------------------------------------------------------------------------------------------------------------------------------------------------------------------------------------------------------------------------------------------------------------------------------------------------------------------------------------------------------|-------------------------------------------------------------------------------------------------------------------------------|------------------------------------------------------------------------------------|----------------------------------------------------------------------------------------------------------------------------------------------------------------------------------------------------------------------------------------------------------------------------------------------------------------------|-----------------------------------------------------------------------------------------------------------------------------------------------------------------------------------------------------------------------------------------------------------------------------------------------------------------|
| Urinary mucosa                                                                                                                                                                                                                                                                                                                                                                                                                                                                                                                                                                                                                                                                                             | 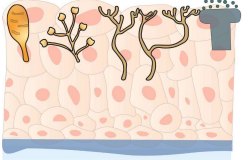 <p>Transitional epithelium</p>              | Allowing the urinary organs to significantly stretch and expand                    | <ul style="list-style-type: none"> <li>•<b>Mechanoreceptors:</b> bladder stretching<sup>79</sup></li> <li>•<b>Nociceptors:</b> acid<sup>80</sup>, inflammatory mediators</li> <li>•<b>Chemoreceptors:</b> toxins, bacteria, detection mediated by taste (e.g. bitter, umami) taste receptors<sup>81</sup></li> </ul> | <ul style="list-style-type: none"> <li>•Regulation of bladder voiding<sup>79</sup></li> <li>•Sensations of bladder filling, pain, urgency, and micturition<sup>82</sup></li> </ul>                                                                                                                              |
| Reproductive mucosa                                                                                                                                                                                                                                                                                                                                                                                                                                                                                                                                                                                                                                                                                        |  <p>Stratified squamous epithelium</p>       | Protection against mechanical abrasions, microorganisms, and water loss            | <ul style="list-style-type: none"> <li>•<b>Mechanoreceptors:</b> uterine stretching, pressure<sup>83</sup></li> <li>•<b>Nociceptors:</b> distension, injury, inflammation<sup>84</sup></li> <li>•<b>Chemoreceptors:</b> reproductive hormones<sup>85</sup></li> </ul>                                                | <ul style="list-style-type: none"> <li>•Regulation of fertility, menstruation, pregnancy, and childbirth<sup>85</sup></li> <li>•Regulation of uterine distension and contractions, and cervical mucosa properties including cervical ripening<sup>85</sup></li> <li>•Sensations of pain<sup>84</sup></li> </ul> |
| Respiratory mucosa                                                                                                                                                                                                                                                                                                                                                                                                                                                                                                                                                                                                                                                                                         |  <p>Pseudostratified columnar epithelium</p> | Secretion and absorption; protection against foreign particles; transport of mucus | <ul style="list-style-type: none"> <li>•<b>Mechanoreceptors:</b> lung inflation, bronchospasm, touch<sup>86</sup></li> <li>•<b>Nociceptors:</b> irritants<sup>87</sup>, carbon dioxide<sup>88</sup></li> <li>•<b>Chemoreceptors:</b> water and acid<sup>89</sup>, ATP<sup>86</sup></li> </ul>                        | <ul style="list-style-type: none"> <li>•Regulation of reflexes including cough, gagging, and sneezing<sup>86</sup> as well as mucus production and blood flow<sup>87</sup></li> <li>•Sensations of urge to cough and taste<sup>89</sup></li> </ul>                                                              |
|  <p>  — Mechanoreceptors (touch, vibration, pressure)      — Thermoreceptors (cold, hot)   </p> <p>  — Nociceptor (pain receptor)      — Photoreceptor      — Chemoreceptors   </p> |                                                                                                                               |                                                                                    |                                                                                                                                                                                                                                                                                                                      |                                                                                                                                                                                                                                                                                                                 |

## References:

1. Human Skin Is the Largest Epithelial Surface for Interaction with Microbes. *J. Invest. Dermatol.* **137**, 1213–1214 (2017).
2. Helander, H. F. & Fändriks, L. Surface area of the digestive tract - revisited. *Scand. J. Gastroenterol.* **49**, 681–689 (2014).
3. Fröhlich, E., Mercuri, A., Wu, S. & Salar-Behzadi, S. Measurements of Deposition, Lung Surface Area and Lung Fluid for Simulation of Inhaled Compounds. *Front. Pharmacol.* **7**, 181 (2016).
4. Chalana, V., Dudycha, S., Yuk, J.-T. & McMorrow, G. Automatic Measurement of Ultrasound-Estimated Bladder Weight (UEBW) from Three-Dimensional Ultrasound. *Rev. Urol.* **7 Suppl 6**, S22–8 (2005).
5. Paxton, S., Peckham, M. & Knibbs, A. *The Leeds Histology Guide*. (2003).
6. Chu, J. N. & Traverso, G. Foundations of gastrointestinal-based drug delivery and future developments. *Nat. Rev. Gastroenterol. Hepatol.* (2021) doi:10.1038/s41575-021-00539-w.
7. Rapaccini, G. L. *et al.* Gastric wall thickness in normal and neoplastic subjects: a prospective study performed by abdominal ultrasound. *Gastrointest. Radiol.* **13**, 197–199 (1988).
8. Chekan, E. G., Cummings, J. F., Mabe, I., Hunter, S. & Clymer, J. W. Thickness of Cadaveric Human Lung Tissue. *Surg. Technol. Int.* **29**, 207–213 (2016).
9. Theriault, M.-M., Eddy, K., Borgaonkar, J. N., Babar, J. L. & Manos, D. Diseases Involving the Central Bronchi: Multidetector CT for Detection, Characterization, and Differential Diagnosis. *RadioGraphics* (2018) doi:10.1148/rg.2018170097.pres.
10. Weerakkody, Y. Endometrial thickness. <https://doi.org/10.53347/rID-8106>.
11. Hakenberg, O. W., Linne, C., Manseck, A. & Wirth, M. P. Bladder wall thickness in normal adults and men with mild lower urinary tract symptoms and benign prostatic enlargement. *Neurourol. Urodyn.* **19**, 585–593 (2000).
12. Agache, P. G., Monneur, C., Leveque, J. L. & De Rigal, J. Mechanical properties and Young's modulus of human skin in vivo. *Archives of Dermatological Research* vol. 269 221–232 (1980).
13. Yu, B. *et al.* An elastic second skin. *Nat. Mater.* **15**, 911–918 (2016).
14. Egorov, V. I., Schastlivtsev, I. V., Prut, E. V., Baranov, A. O. & Turusov, R. A. Mechanical properties of the human gastrointestinal tract. *J. Biomech.* **35**, 1417–1425 (2002).
15. Ionescu, C. M., Segers, P. & De Keyser, R. Mechanical properties of the respiratory system derived from morphologic insight. *IEEE Trans. Biomed. Eng.* **56**, 949–959 (2009).
16. Ionescu, C. M. Modeling the Respiratory Tract by Means of Electrical Analogy. *The Human Respiratory System* 39–54 (2013) doi:10.1007/978-1-4471-5388-7\_4.
17. Sarna, M. *et al.* Undifferentiated bronchial fibroblasts derived from asthmatic patients display higher elastic modulus than their non-asthmatic counterparts. *PLoS One* **10**, e0116840 (2015).
18. Baah-Dwomoh, A., McGuire, J., Tan, T. & De Vita, R. Mechanical Properties of Female Reproductive Organs and Supporting Connective Tissues: A Review of the Current State of Knowledge. *Applied Mechanics Reviews* vol. 68 (2016).
19. Fernandez, M. *et al.* Investigating the mechanical function of the cervix during pregnancy using finite element models derived from high-resolution 3D MRI. *Comput. Methods Biomech. Biomed. Engin.* **19**, 404–417 (2016).

20. Li, C. *et al.* Quantitative elasticity measurement of urinary bladder wall using laser-induced surface acoustic waves. *Biomed. Opt. Express* **5**, 4313–4328 (2014).
21. van Kuilenburg, J., Masen, M. A. & van der Heide, E. Contact modelling of human skin: What value to use for the modulus of elasticity? *Proceedings of the Institution of Mechanical Engineers, Part J: Journal of Engineering Tribology* vol. 227 349–361 (2013).
22. Jia, Z. G., Li, W. & Zhou, Z. R. Mechanical characterization of stomach tissue under uniaxial tensile action. *J. Biomech.* **48**, 651–658 (2015).
23. Chen, Z.-L., Chen, Y.-Z. & Hu, Z.-Y. A micromechanical model for estimating alveolar wall strain in mechanically ventilated edematous lungs. *J. Appl. Physiol.* **117**, 586–592 (2014).
24. Jang, T.-M. *et al.* Expandable and implantable bioelectronic complex for analyzing and regulating real-time activity of the urinary bladder. *Sci Adv* **6**, (2020).
25. Koster, M. I. Making an epidermis. *Ann. N. Y. Acad. Sci.* **1170**, 7–10 (2009).
26. Marques-Pereira, J. P. & Leblond, C. P. MITOSIS AND DIFFERENTIATION IN THE STRATIFIED SQUAMOUS EPITHELIUM OF THE RAT ESOPHAGUS. *Am. J. Anat.* **117**, 73–87 (1965).
27. Messier, B. & Leblond, C. P. Cell proliferation and migration as revealed by radioautography after injection of thymidine-H3 into male rats and mice. *Am. J. Anat.* **106**, 247–285 (1960).
28. Sender, R. & Milo, R. The distribution of cellular turnover in the human body. *Nat. Med.* **27**, 45–48 (2021).
29. Squier, C. A. & Kremer, M. J. Biology of Oral Mucosa and Esophagus. *JNCI Monographs* vol. 2001 7–15 (2001).
30. Mowat, A. M. & Agace, W. W. Regional specialization within the intestinal immune system. *Nat. Rev. Immunol.* **14**, 667–685 (2014).
31. Adamson, I. Y. R. Cellular Kinetics of the Lung. *Toxicology of Inhaled Materials* 289–317 (1985) doi:10.1007/978-3-642-69521-6\_11.
32. Richart, R. M. A RADIOAUTOGRAPHIC ANALYSIS OF CELLULAR PROLIFERATION IN DYSPLASIA AND CARCINOMA IN SITU OF THE UTERINE CERVIX. *Am. J. Obstet. Gynecol.* **86**, 925–930 (1963).
33. Khandelwal, P., Abraham, S. N. & Apodaca, G. Cell biology and physiology of the uroepithelium. *American Journal of Physiology-Renal Physiology* vol. 297 F1477–F1501 (2009).
34. Balsara, Z. R. & Li, X. Sleeping beauty: awakening urothelium from its slumber. *Am. J. Physiol. Renal Physiol.* **312**, F732–F743 (2017).
35. Sarna, S. K. *Colonic Motility: From Bench Side to Bedside.* (Morgan & Claypool Life Sciences, 2011).
36. Shafiq, G. & Veluvolu, K. C. Surface chest motion decomposition for cardiovascular monitoring. *Scientific reports* vol. 4 5093 (2014).
37. Aguilar, H. N. & Mitchell, B. F. Physiological pathways and molecular mechanisms regulating uterine contractility. *Hum. Reprod. Update* **16**, 725–744 (2010).
38. Al-Mukhaizeem, F. *et al.* Comparison of temporal artery, rectal and esophageal core temperatures in children: Results of a pilot study. *Paediatr. Child Health* **9**, 461–465 (2004).
39. Pearson, J. *et al.* Pulmonary artery and intestinal temperatures during heat stress and cooling. *Med. Sci. Sports Exerc.* **44**, 857–862 (2012).
40. McFadden, E. R., Jr *et al.* Thermal mapping of the airways in humans. *J. Appl. Physiol.* **58**, 564–570 (1985).



41. Basal Body Temperature (BBT) Charting. <https://www.uofmhealth.org/health-library/hw202058>.
42. Stelfox, H. T. *et al.* Temporal Artery versus Bladder Thermometry during Adult Medical-Surgical Intensive Care Monitoring: An Observational Study. *BMC Anesthesiology* vol. 10 (2010).
43. Kimberger, O., Cohen, D., Illievich, U. & Lenhardt, R. Temporal Artery Versus Bladder Thermometry During Perioperative and Intensive Care Unit Monitoring. *Anesthesia & Analgesia* vol. 105 1042–1047 (2007).
44. Ali, S. & Yosipovitch, G. Skin pH: From Basic Science to Basic Skin Care. *Acta Dermato Venereologica* vol. 93 261–267 (2013).
45. Evans, D. F. *et al.* Measurement of gastrointestinal pH profiles in normal ambulant human subjects. *Gut* **29**, 1035–1041 (1988).
46. Healthfully. <https://healthfully.com/symptoms-of-potassium-overdose-3443110.html>.
47. Vaughan, J. *et al.* Exhaled breath condensate pH is a robust and reproducible assay of airway acidity. *Eur. Respir. J.* **22**, 889–894 (2003).
48. Ng, K. Y. B., Mingels, R., Morgan, H., Macklon, N. & Cheong, Y. In vivo oxygen, temperature and pH dynamics in the female reproductive tract and their importance in human conception: a systematic review. *Human Reproduction Update* vol. 24 15–34 (2018).
49. Welch, A. A., Mulligan, A., Bingham, S. A. & Khaw, K.-T. Urine pH is an indicator of dietary acid-base load, fruit and vegetables and meat intakes: results from the European Prospective Investigation into Cancer and Nutrition (EPIC)-Norfolk population study. *Br. J. Nutr.* **99**, 1335–1343 (2008).
50. Institute of Medicine (US) Committee on Military Nutrition Research. *Nutritional Needs in Hot Environments: Applications for Military Personnel in Field Operations*. (National Academies Press (US), 2014).
51. human digestive system. <https://www.britannica.com/science/human-digestive-system>.
52. Ma, T. & Verkman, A. S. Aquaporin water channels in gastrointestinal physiology. *The Journal of Physiology* vol. 517 317–326 (1999).
53. Richardson, M. The physiology of mucus and sputum production in the respiratory system. *Nurs. Times* **99**, 63–64 (2003).
54. UpToDate. <https://www.uptodate.com/contents/vaginal-discharge-in-adult-women-beyond-the-basics/print>.
55. Pietrangelo, A. Urine 24-Hour Volume Test. <https://www.healthline.com/health/urine-24-hour-volume> (2012).
56. Craig, S. S. *et al.* The betaine content of sweat from adolescent females. *J. Int. Soc. Sports Nutr.* **7**, 3 (2010).
57. human digestive system. <https://www.britannica.com/science/human-digestive-system>.
58. Steiger, C. *et al.* Dynamic Monitoring of Systemic Biomarkers with Gastric Sensors. *Adv. Sci.* **8**, e2102861 (2021).
59. Rogers, D. F. & Barnes, P. J. Treatment of airway mucus hypersecretion. *Annals of Medicine* vol. 38 116–125 (2006).
60. Boundless. Physiology of the Kidneys. <https://courses.lumenlearning.com/boundless-ap/chapter/physiology-of-the-kidneys/>.
61. Loomis, K. H. *et al.* A mixed community of skin microbiome representatives influences cutaneous processes more than individual members. *Microbiome* **9**, 22 (2021).

62. Dieterich, W., Schink, M. & Zopf, Y. Microbiota in the Gastrointestinal Tract. *Medical Sciences* vol. 6 116 (2018).
63. Thursby, E. & Juge, N. Introduction to the human gut microbiota. *Biochem. J* **474**, 1823–1836 (2017).
64. Cryan, J. F., O’Riordan, K. J., Sandhu, K., Peterson, V. & Dinan, T. G. The gut microbiome in neurological disorders. *Lancet Neurol.* **19**, 179–194 (2020).
65. Man, W. H., de Steenhuijsen Piters, W. A. A. & Bogaert, D. The microbiota of the respiratory tract: gatekeeper to respiratory health. *Nat. Rev. Microbiol.* **15**, 259–270 (2017).
66. Al-Nasiry, S. *et al.* The Interplay Between Reproductive Tract Microbiota and Immunological System in Human Reproduction. *Front. Immunol.* **11**, 378 (2020).
67. Jones-Freeman, B. *et al.* The microbiome and host mucosal interactions in urinary tract diseases. *Mucosal Immunol.* **14**, 779–792 (2021).
68. Kalantar-Zadeh, K., Berean, K. J., Burgell, R. E., Muir, J. G. & Gibson, P. R. Intestinal gases: influence on gut disorders and the role of dietary manipulations. *Nat. Rev. Gastroenterol. Hepatol.* **16**, 733–747 (2019).
69. Yang, W. H. & Shen, N. C. Gas-forming infection of the urinary tract: an investigation of fermentation as a mechanism. *J. Urol.* **143**, 960–964 (1990).
70. Němeček, D., Dvořáková, M. & Sedmíková, M. Heme oxygenase/carbon monoxide in the female reproductive system: an overlooked signalling pathway. *Int. J. Biochem. Mol. Biol.* **8**, 1–12 (2017).
71. Iheanacho, F. & Vellipuram, A. R. Physiology, Mechanoreceptors. in *StatPearls* (StatPearls Publishing, 2021).
72. Pinho-Ribeiro, F. A. & Chiu, I. M. Nociceptor nerves set the stage for skin immunity. *Cell research* vol. 29 877–878 (2019).
73. Kobayashi, S. Temperature receptors in cutaneous nerve endings are thermostat molecules that induce thermoregulatory behaviors against thermal load. *Temperature (Austin)* **2**, 346–351 (2015).
74. Wicks, N. L., Chan, J. W., Najera, J. A., Ciriello, J. M. & Oancea, E. UVA phototransduction drives early melanin synthesis in human melanocytes. *Curr. Biol.* **21**, 1906–1911 (2011).
75. Dickson, I. A role for nociceptor neurons in gut defence. *Nature reviews. Gastroenterology & hepatology* vol. 17 65 (2020).
76. Lai, N. Y., Mills, K. & Chiu, I. M. Sensory neuron regulation of gastrointestinal inflammation and bacterial host defence. *J. Intern. Med.* **282**, 5–23 (2017).
77. Akiba, Y. & Kaunitz, J. D. Luminal chemosensing and upper gastrointestinal mucosal defenses. *Am. J. Clin. Nutr.* **90**, 826S–831S (2009).
78. El Ouazzani, T. Thermoreceptors in the digestive tract and their role. *J. Auton. Nerv. Syst.* **10**, 246–254 (1984).
79. Zagorodnyuk, V. P., Costa, M. & Brookes, S. J. H. Major classes of sensory neurons to the urinary bladder. *Auton. Neurosci.* **126-127**, 390–397 (2006).
80. Montalbetti, N. & Carattino, M. D. Acid-sensing ion channels modulate bladder nociception. *Am. J. Physiol. Renal Physiol.* **321**, F587–F599 (2021).
81. Deckmann, K. & Kummer, W. Chemosensory epithelial cells in the urethra: sentinels of the urinary tract. *Histochem. Cell Biol.* **146**, 673–683 (2016).

82. Wyndaele, J. J. & De Wachter, S. The basics behind bladder pain: a review of data on lower urinary tract sensations. *Int. J. Urol.* **10 Suppl**, S49–55 (2003).
83. Liu, B., Eisenach, J. C. & Tong, C. Chronic estrogen sensitizes a subset of mechanosensitive afferents innervating the uterine cervix. *J. Neurophysiol.* **93**, 2167–2173 (2005).
84. Jobling, P., O’Hara, K. & Hua, S. Female reproductive tract pain: targets, challenges, and outcomes. *Front. Pharmacol.* **5**, 17 (2014).
85. Mowa, C. N. & Papka, R. E. The role of sensory neurons in cervical ripening: effects of estrogen and neuropeptides. *J. Histochem. Cytochem.* **52**, 1249–1258 (2004).
86. Mazzone, S. B. An overview of the sensory receptors regulating cough. *Cough* **1**, 2 (2005).
87. Pinho-Ribeiro, F. A., Verri, W. A., Jr & Chiu, I. M. Nociceptor Sensory Neuron-Immune Interactions in Pain and Inflammation. *Trends Immunol.* **38**, 5–19 (2017).
88. Thürauf, N., Hummel, T., Kettenmann, B. & Kobal, G. Nociceptive and reflexive responses recorded from the human nasal mucosa. *Brain Res.* **629**, 293–299 (1993).
89. Bradley, R. M. Sensory receptors of the larynx. *Am. J. Med.* **108**, 47–50 (2000).

#### **Competing interests:**

Complete details of all relationships for profit and not for profit for G.T. can be found in the table below and at the following link:

<https://www.dropbox.com/sh/szi7vnr4a2ajb56/AABs5N5i0q9AfT1IqIJAE-T5a?dl=0>.

**Disclosures - Carlo Giovanni Traverso - encompassing all professional not-for-profit and for profit relationships**

**Date: June 8, 2022**

Please note that I make every effort to maintain this document up to date and as part of the disclosure process governed by the Sunshine Act further details can be found at:  
<https://openpaymentsdata.cms.gov/physician/431893>

**Employment and Professional Affiliations**

|                                                   | Position(s)                                                                                                  | Years                   |
|---------------------------------------------------|--------------------------------------------------------------------------------------------------------------|-------------------------|
| Trinity College, University of Cambridge          | Undergraduate student (1995-1998), Junior Research Fellow / Title A (2002-2007), Medical Student (2002-2006) | 1995-1998, 2002-2007    |
| Hospital for Sick Children, University of Toronto | Research Assistant (1997-1999)                                                                               | 1997-1999               |
| Johns Hopkins University                          | PhD graduate student (1998-2002), Post-doctoral fellow (2002-2003)                                           | 1998-2003               |
| Harvard Medical School                            | Fellow (2007-2014), Instructor (2014-2017), Assistant Professor, part time (2017-present)                    | 2007-present            |
| Brigham and Women's Hospital                      | Internal Medicine Resident (2007-2009), Attending Physician (2016-present)                                   | 2007-2009, 2016-present |
| Massachusetts Institute of Technology             | Research Affiliate (2009-2018), Visiting Scientist (2018-present), Assistant Professor (2019-present)        | 2009-present            |
| Massachusetts General Hospital                    | Gastroenterology Fellow (2009-2014), Attending Physician (2014-2015)                                         | 2009-2015               |

**For Profit**

|                            | Equity/Stock | Board/Advisor | Consultant | Royalties | Gifts | Grants/<br>Scholarship | Years        |
|----------------------------|--------------|---------------|------------|-----------|-------|------------------------|--------------|
| Exact Sciences             |              |               |            | x         |       |                        | 2002-2014    |
| Horizon                    |              |               |            | x         |       |                        | 2014-2016    |
| Pavoda                     | x            | x             | x          |           |       |                        | 2015         |
| Entrega, Inc               |              |               | x          |           |       |                        | 2015         |
| CBSET                      |              |               | x          |           |       |                        | 2015         |
| Avaxia                     |              |               | x          |           |       |                        | 2015-present |
| Lyndra                     | x            | x             |            | x         |       |                        | 2015-present |
| Novo Nordisk               |              |               | x          |           |       | x                      | 2015-2016    |
| SNS Nano                   |              |               | x          |           |       |                        | 2015-2017    |
| Hoffman la Roche           |              |               |            |           |       | x                      | 2016         |
| Janssen                    |              |               |            |           |       |                        | 2016         |
| Egalet                     |              | x             | x          |           |       |                        | 2016         |
| Janssen                    |              |               | x          |           |       |                        | 2016         |
| BMS                        |              |               |            |           | x     |                        | 2016-2018    |
| Synlogic                   |              |               | x          |           |       |                        | 2016-2018    |
| Freonome                   |              |               |            |           |       | x                      | 2017-present |
| Suono Bio                  | x            | x             |            | x         |       |                        | 2018         |
| Merck                      |              |               | x          |           |       |                        | 2018-2019    |
| Verily                     |              |               | x          |           |       |                        | 2018-present |
| Eagle Pharmaceuticals, Inc |              |               | x          |           |       |                        | 2018-present |
| Vivtex                     | x            | x             |            | x         |       |                        | 2018-present |
| Celero Systems             | x            | x             |            | x         |       |                        | 2020-present |
| Bilayer Therapeutics, Inc  | x            | x             |            | x         |       |                        | 2020-present |
| Teal Bio, Inc              | x            | x             |            | x         |       |                        | 2020-2021    |
| Oracle                     |              |               |            |           |       | x                      | 2020         |
| Wired Consulting           |              |               | x          |           |       |                        | 2021         |
| Avadel Pharmaceuticals     |              |               | x          |           |       |                        | 2022         |
| Moderna                    |              |               | x          |           |       |                        | 2022-present |
| Syntis Bio                 | x            | x             | x          |           |       |                        |              |

**Not for Profit**

|                                                                     | Equity/Stock | Board/Advisor | Consultant | Royalties | Gifts | Grants/<br>Scholarship | Years           |
|---------------------------------------------------------------------|--------------|---------------|------------|-----------|-------|------------------------|-----------------|
| Draper Laboratory                                                   |              |               |            |           |       | x                      | 2012, 2019-2020 |
| MIT Lincoln Laboratory                                              |              |               |            |           |       | x                      | 2018-present    |
| NIH/NIBIB                                                           |              |               |            |           |       | x                      | 2015-2016       |
| Kenneth Rainin                                                      |              | x             |            |           |       |                        | 2013-present    |
| Bill and Melinda Gates Foundation                                   |              |               |            |           |       | x                      | 2018-present    |
| NIH/NCI                                                             |              |               |            |           |       | x                      | 2002-present    |
| Johns Hopkins University / Technology Transfer Office               |              |               |            | x         |       |                        | 2015-present    |
| Massachusetts Institute of Technology / Technology Licensing Office |              |               |            | x         |       |                        | 2018-present    |
| Mass General Brigham Innovation / Technology Licensing              |              |               |            | x         |       |                        | 1995-1998       |
| Cambridge Commonwealth and Overseas Trusts, Univ. of Cambridge      |              |               |            |           |       | x                      | 2003-2006       |
| Foulkes Foundation                                                  |              |               | x          |           |       |                        | 2019-2022       |
| Trinity College, University of Cambridge                            |              |               |            |           |       | x                      | 2020-present    |
| The Leona M. and Harry B. Helmsley Charitable Trust                 |              |               |            |           |       | x                      | 2021-present    |
| Karl van Tassel (1925) Career Development Professorship, MIT        |              |               |            |           |       | x                      |                 |
| Defense Advanced Research Projects Agency                           |              |               |            |           |       | x                      |                 |
